# Supplementary material for: Allyl-terminated small molecule donors effectively regulate miscibility to improve the performance of organic solar cells
Source: Royal Society of Chemistry journal article supplement (doi:10.1039/d4tc05389c), 2025-01-01
Supplement: d4tc05389c1.pdf [file d4tc05389c1.pdf]

## Supporting Information

### **Allyl-terminated organic small molecule donors effectively regulate miscibility to improve the performance of organic solar cells**

Jiaxin Dai <sup>a</sup>, Panpan Zhang <sup>a</sup>, Bo Du <sup>a</sup>, MengYuan Ma<sup>a</sup>, Shangrong Wu <sup>a</sup>, Yuchuan Tian <sup>c</sup>, Junyu Li <sup>c\*</sup>, Haijun Bin <sup>a, b\*</sup>, Yongfang Li <sup>a, b\*</sup>

<sup>a</sup> Laboratory of Advanced Optoelectronic Materials, Suzhou Key Laboratory of Novel Semiconductor Materials and Devices, College of Chemistry, Chemical Engineering and Materials Science, Soochow University, Suzhou, 215123, Jiangsu, PR China.

E-mail: [hjbin24@suda.edu.cn](mailto:hjbin24@suda.edu.cn)

<sup>b</sup> Jiangsu Key Laboratory of Advanced Negative Carbon Technologies, Soochow University, Suzhou, 215123, Jiangsu, PR China.

<sup>c</sup> Sinopec Shanghai Research Institute of Petrochemical Technology, Shanghai 201028, PR China.

### **Experimental Section**

#### **Instruments and Measurements**

##### **<sup>1</sup>HNMR and MALDI-TOF-MS measurements**

<sup>1</sup>HNMR spectra were recorded in CDCl<sub>3</sub> on a Bruker AV 400 MHz FT-NM spectrometer, and chemical shifts are quoted relative to tetramethyl silane for <sup>1</sup>H. The molecular mass was confirmed by using an Ultraflextreme matrix-assisted laser desorption ionization mass spectrometer (MALDI-TOF-MS).

##### **TGA and DSC measurements.**

Thermogravimetric analysis (TGA) and differential scanning calorimetry (DSC) were conducted on METTLER-TOLEDO STARe at a heating rate of 10 °C min<sup>-1</sup> and under an N<sub>2</sub> rate of 90 mL min<sup>-1</sup>.

##### **Electrochemical characterizations.**

Cyclic voltammetry was performed on a Zahner IM6e electrochemical workstation with a three-electrode system in a 0.1 M [Bu<sub>4</sub>N]PF<sub>6</sub> acetonitrile solution at a scan rate of 100 mV s<sup>-1</sup>. A glassy carbon coated with a small-molecule film was used as the working electrode. A Pt wire was used as the counter electrode, and Ag/Ag<sup>+</sup> was used as the reference electrode. A ferrocene/ferrocenium redox couple was used as the external standard, and its redox potential was 0.11 V versus Ag/Ag<sup>+</sup>. The HOMO and LUMO energy levels were calculated from the onset of the oxidation and reduction potential of the SMDs and acceptors using the following equations:  $E_{\text{HOMO}}/E_{\text{LUMO}} = -e(\varphi_{\text{ox}}/\varphi_{\text{red}} + 4.8 - \varphi_{\text{Fc}}/\varphi_{\text{Fc}^+})$  (eV).

#### **UV-vis-NIR absorption**

Ultraviolet-visible-near infrared (UV-vis-NIR) absorption spectra was taken on an Agilent Technologies Cary 5000 Series UV-vis-NIR Spectrophotometer.

#### ***J-V* and EQE measurements**

The current density-voltage (*J-V*) characteristics were recorded with a Keithley 2450. The power conversion efficiencies were measured under 1 sun, AM 1.5G (air mass 1.5 global) (100 mW cm<sup>-2</sup>) using an SS-F5-3A (Enli Technology CO., Ltd.) solar simulator (AAA grade, 50mm × 50 mm photo-beam size). 2×2 cm<sup>2</sup> Monocrystalline silicon reference cell (SRC-00019, covered with a KG5 filter window) was purchased from Enli Technology CO., Ltd. The EQE was measured by Solar Cell Spectral Response Measurement System LST-QE (JinZhu Tech CO., Ltd.). The light intensity at each wavelength was calibrated with a standard single-crystal Si photovoltaic cell.

#### **SCLC mobility measurements**

The hole and electron mobilities of devices were evaluated from the space-charge-limited current (SCLC) method with the hole-only structure of ITO/PEDOT:PSS/blend films/MoO<sub>3</sub>/Ag and electron-only structure of ITO/ZnO/blend films/PFN-Br/Ag, respectively. The corresponding charge mobilities were calculated from fitting the Mott-Gurney square law  $J = 9\epsilon_r\epsilon_0\mu V_2/(8L^3)$ , where  $J$  is the current density,  $\epsilon_r$  is the dielectric permittivity of the active layer (assumed to be 3),  $\epsilon_0$  is the vacuum permittivity,  $L$  is the thickness of the active layer,  $\mu$  is the hole or electron mobility.  $V = V_{\text{appl}} - V_{\text{bi}} - V_s$ ,  $V_{\text{appl}}$  is the applied voltage,  $V_{\text{bi}}$  is the built-in voltage,  $V_s$  is the voltage drop from the substrate's series resistance ( $V_s = IR$ ). The SCLC devices were measured under a dark condition in a nitrogen glovebox without encapsulation.

### **AFM measurements**

The morphologies of the blend films were investigated by Atomic Force Microscope (AFM) measurements (Bruker, Multimode 8 SPM Systema) in contacting under normal air conditions at room temperature with 2  $\mu\text{m}$  scanner.

### **TEM measurements**

Transmission electron microscopy (TEM) was performed using a Tecnai G2 F20 S-TWIN instrument at 200 kV accelerating voltage, in which the blend films were prepared as following: First, the blend films were spin-coated on the PEDOT:PSS/ITO substrates; Second, the resulting blend film/PEDOT:PSS/ITO substrates were submerged in deionized water to make these blend films float onto the air-water interface; Finally, the floated blend films were taken up on unsupported 200 mesh copper grids for a TEM measurement.

### **TPC and TPV measurements**

Transient photovoltage (TPV) and transient photocurrent (TPC) measurements were carried out under a 337 nm 3.5 ns pulse laser (160  $\mu$ J per pulse at 10 Hz) and halide lamps (150 W). Voltage and current dynamics were recorded on a digital oscilloscope (Tektronix MDO3102).

### **Contact angle measurements**

The contact angle tests were performed on a Data physics OCA40 Micro surface contact angle analyzer. The surface energy was characterized and calculated by the contact angles of the two probe liquids (ultrapure water and diiodomethane).

### **GIWAXS measurements**

GIWAXS measurements were carried out on the Xeuss 3.0 UHR system from Xenocs. The instrument is equipped with a Eiger 1M detector with a pixel size of 75 $\mu$ m  $\times$  75 $\mu$ m. The X-ray source is a Microfocus Sealed Tube X-ray Cu-source with the wavelength of  $\lambda = 1.54 \text{ \AA}$ . The sample was placed horizontally on the goniometer at a grazing angle of 0.2° relative to the incident beam.

### **Fabrication and Characterization of All-Small-Molecule Solar Cells**

All the devices with a conventional device structure of ITO/PEDOT:PSS (30 nm)/active layers/PFN-Br (5 nm)/Ag (100 nm) were fabricated under conditions as follows. The patterned indium tin oxide (ITO) coated glasses were cleaned with detergent and then underwent a wet-cleaning process inside an ultrasonic bath procedure, followed by ultrapure water, acetone, and isopropanol in sequence, and then blown dry through high-purity nitrogen. After the treatment in a UV-Ozone Cleaner for

20 min, PEDOT:PSS (Heraeus Clevis PVP Al 4083) was deposited by spin-coating under 6000 rpm for 40 s on the cleaned ITO substrate. Then the films were annealed at a hot plate of 150 °C for 15 min in the air and the substrates were transferred into a glove box immediately.

The optimal H35:Y6 and H36:Y6 (2:1, w/w) are dissolved in chloroform (CF) with concentration of 20 mg mL<sup>-1</sup>, which is placed to a hot plate at 60 °C for CF stirred for 12 h. The blend solution was spin-cast at 2000 ~ 2500 rpm for 40 s over the ITO glasses form a ~ 100 nm thickness of the active layer, followed by thermal annealing. H35:Y6 thermal annealing at 140 °C for 5 min, and H36:Y6 thermal annealing at 100 °C for 5 min.

The optimal H35:PY-IT and H36:PY-IT (2.7:1, w/w) are dissolved in chloroform (CF) with concentration of 16 mg mL<sup>-1</sup>, which is placed to a hot plate at 60 °C stirred for 12 h. The blend solution was spin-cast at 2000 ~ 2500 rpm for 40 s over the ITO glasses form a ~ 100 nm thickness of the active layer, followed by thermal annealing at 140 °C for 5 min.

Next, the electron-transport material PFN-Br with a concentration of 0.5 mg mL<sup>-1</sup> in methanol was spin-coated onto the active layer at 3000 rpm for 30 s. Finally, the Ag electrode (100 nm thickness) was vacuum-deposited onto the PFN-Br layer under a pressure of  $4.0 \times 10^{-4}$  Pa.

### **Detailed synthesis procedures**

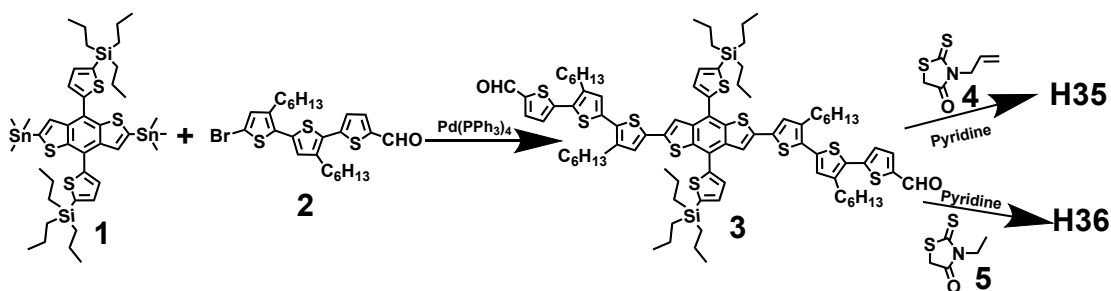

### Synthesis of compound **3**:

Compound **1** (200 mg 0.201 mmol) and compound **2** (232.05 mg 0.44 mmol) were added into a 200 mL flask at room temperature, followed by dissolution in 20 mL of toluene. Subsequently, Pd(PPh<sub>3</sub>)<sub>4</sub> (23 mg 10%) was added under argon protection. After the solution was stirred under reflux at 110 °C under the protection of argon for 24 h, the mixture was cooled to room temperature. The reaction was then quenched by addition of water. The mixture was extracted with CH<sub>2</sub>Cl<sub>2</sub>, and the combined organic layers were washed with brine, dried over dry Mg<sub>2</sub>SO<sub>4</sub>, and filtered. After removal of solvent, the crude product was purified by column chromatography on silica gel to afford compound **3** as a red solid (230 mg, 74.2% yield).

<sup>1</sup>H NMR (400 MHz, CDCl<sub>3</sub>) δ 9.88 (s, 2H), 7.71 (d, *J* = 4.0 Hz, 2H), 7.63 (s, 2H), 7.58 (d, *J* = 3.4 Hz, 2H), 7.40 (d, *J* = 3.4 Hz, 2H), 7.23 (d, *J* = 3.9 Hz, 2H), 7.11 (s, 2H), 7.01 (s, 2H), 2.83 – 2.75 (m, 8H), 1.71 – 1.66 (m, 8H), 1.46 – 1.29 (m, 31H), 1.25 (s, 5H), 1.06 (t, *J* = 7.2 Hz, 20H), 0.93 – 0.86 (m, 22H). MALDI-TOF MS: calcd. for C<sub>86</sub>H<sub>110</sub>O<sub>2</sub>S<sub>10</sub>Si<sub>2</sub>, *m/z* = 1550.53; found 1551.064.

### Synthesis of **H35**:

Compound **3** (200 mg, 0.128 mmol) and compound **4** (112 mg, 0.64 mmol) were dissolved in CHCl<sub>3</sub> (25 mL) under an argon atmosphere, and then piperidine (0.3 mL) was added into the mixture by syringe. The reaction was stirred at 65 °C for 6 h. Then,

the mixture was poured into water and extracted with  $\text{CH}_2\text{Cl}_2$  for three times, the organic layer was dried over anhydrous  $\text{Mg}_2\text{SO}_4$ . After removal of solvent, the crude product was purified by silica gel using chloroform as eluent to afford the target material H35 as solid (180 mg, 75.5% yield).

$^1\text{H}$  NMR (400 MHz,  $\text{CDCl}_3$ )  $\delta$  7.85 (s, 2H), 7.58 (d,  $J = 3.4$  Hz, 4H), 7.40 (d,  $J = 3.4$  Hz, 2H), 7.36 (d,  $J = 4.0$  Hz, 2H), 7.20 (s, 2H), 7.10 (s, 2H), 7.00 (s, 2H), 5.87 (q,  $J = 5.5$  Hz, 2H), 5.32 (s, 1H), 5.27 (t,  $J = 2.3$  Hz, 2H), 5.24 (s, 1H), 4.74 (d,  $J = 5.8$  Hz, 4H), 2.80 (d,  $J = 8.0$  Hz, 8H), 1.69 (q,  $J = 7.6$  Hz, 10H), 1.35 (dd,  $J = 7.1, 3.8$  Hz, 16H), 1.26 (s, 15H), 1.08 (d,  $J = 7.2$  Hz, 18H), 0.96 – 0.90 (m, 27H). MALDI-TOF MS: calcd. for  $\text{C}_{98}\text{H}_{120}\text{N}_2\text{O}_2\text{S}_{14}\text{Si}_2$ ,  $m/z = 1861.50$ ; found 1862.411.

#### Synthesis of **H36**:

The synthetic route of H36 is similar with that of H35, excepting for using compound **5** to replace compound **4**. The crude product was purified by silica gel using chloroform as eluent to afford the target material H36 as solid. (185 mg, 78.6% yield).

$^1\text{H}$  NMR (400 MHz,  $\text{CDCl}_3$ )  $\delta$  7.82 (s, 2H), 7.58 (d,  $J = 4.6$  Hz, 4H), 7.40 (d,  $J = 3.3$  Hz, 2H), 7.33 (d,  $J = 4.1$  Hz, 2H), 7.18 (d,  $J = 4.1$  Hz, 2H), 7.07 (s, 2H), 6.98 (s, 2H), 4.17 (d,  $J = 7.2$  Hz, 4H), 2.77 (dt,  $J = 17.0, 7.9$  Hz, 8H), 1.68 (q,  $J = 7.5$  Hz, 8H), 1.48 – 1.17 (m, 41H), 1.07 (t,  $J = 7.3$  Hz, 19H), 0.99 – 0.87 (m, 24H). MALDI-TOF MS: calcd. for  $\text{C}_{96}\text{H}_{120}\text{N}_2\text{O}_2\text{S}_{14}\text{Si}_2$ ,  $m/z = 1837.50$ ; found 1837.395.

## Supplementary Figures and Tables

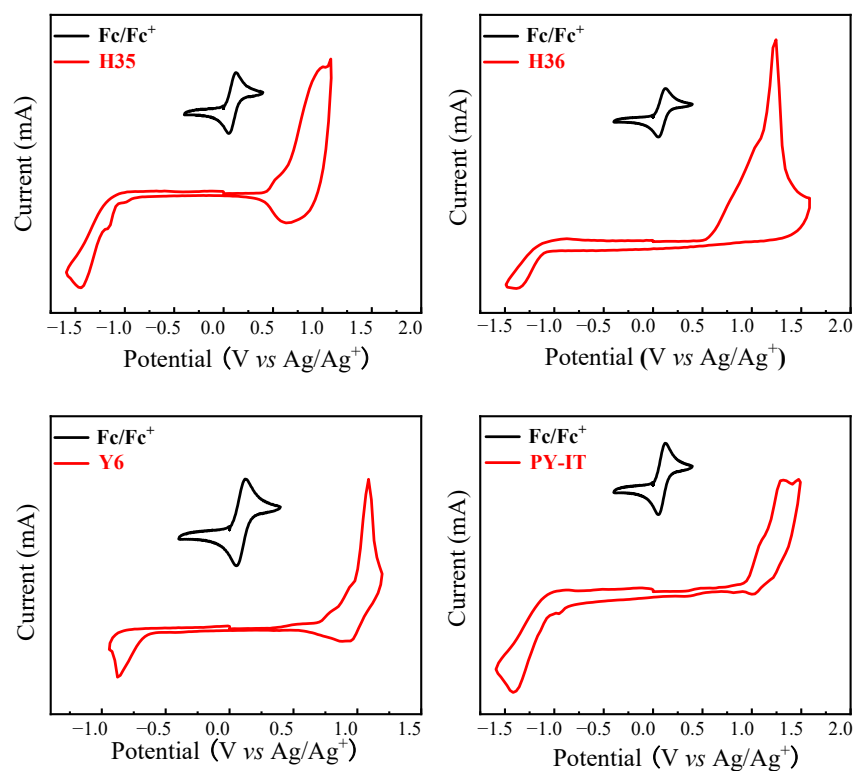

**Figure. S1** CV curves of H35, H36, Y6 and PY-IT in the solid state, respectively.

Ferrocene is used as the redox reference.

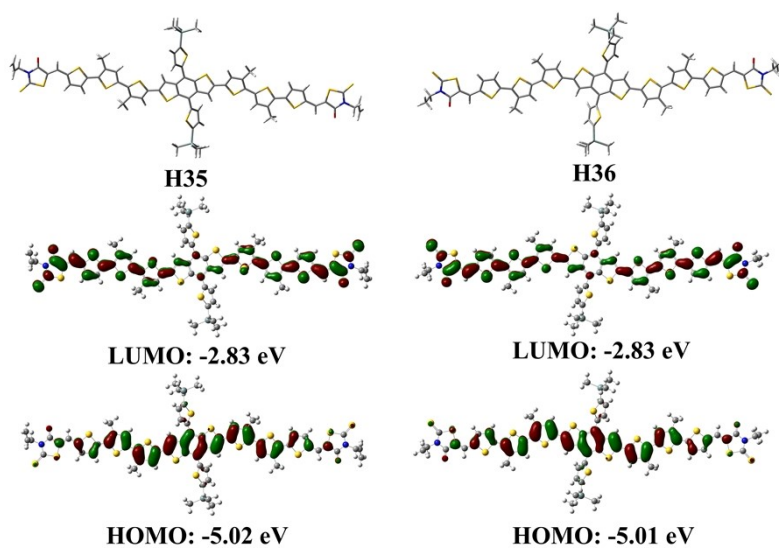

**Figure. S2** The HOMO and LUMO energy levels of H35 and H36 derived from DFT simulations.



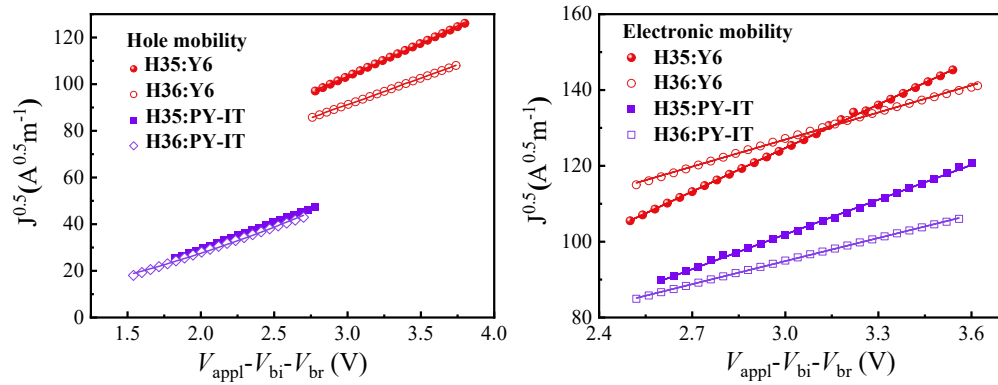

**Figure. S3** Hole and electron mobilities for the blend films.

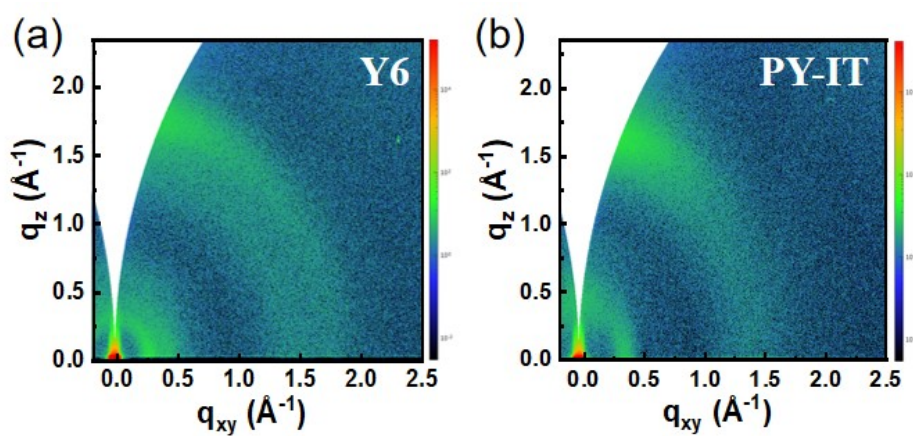

**Figure. S4** 2D GIWAXS diffraction patterns of (a) Y6 neat film; (b) PY-IT neat film.

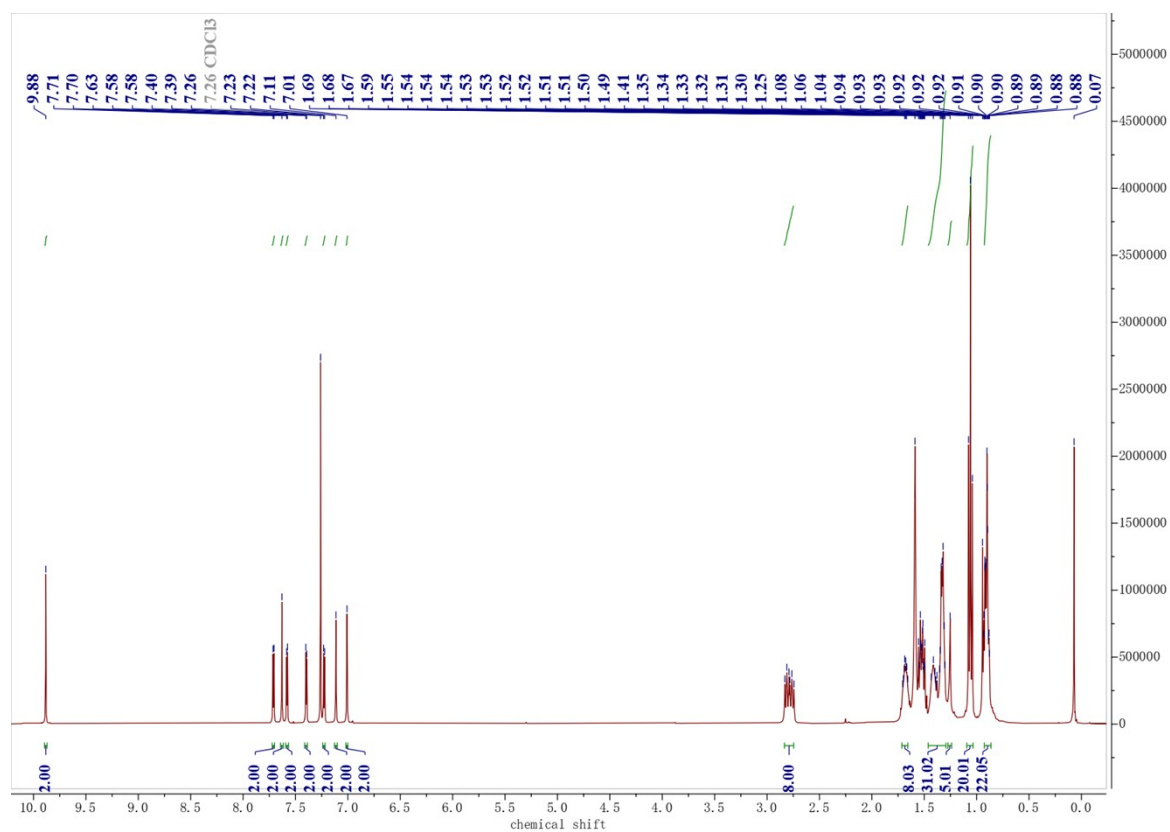

Figure S5.  $^1\text{H}$  NMR spectra of compound **3** in  $\text{CDCl}_3$ .

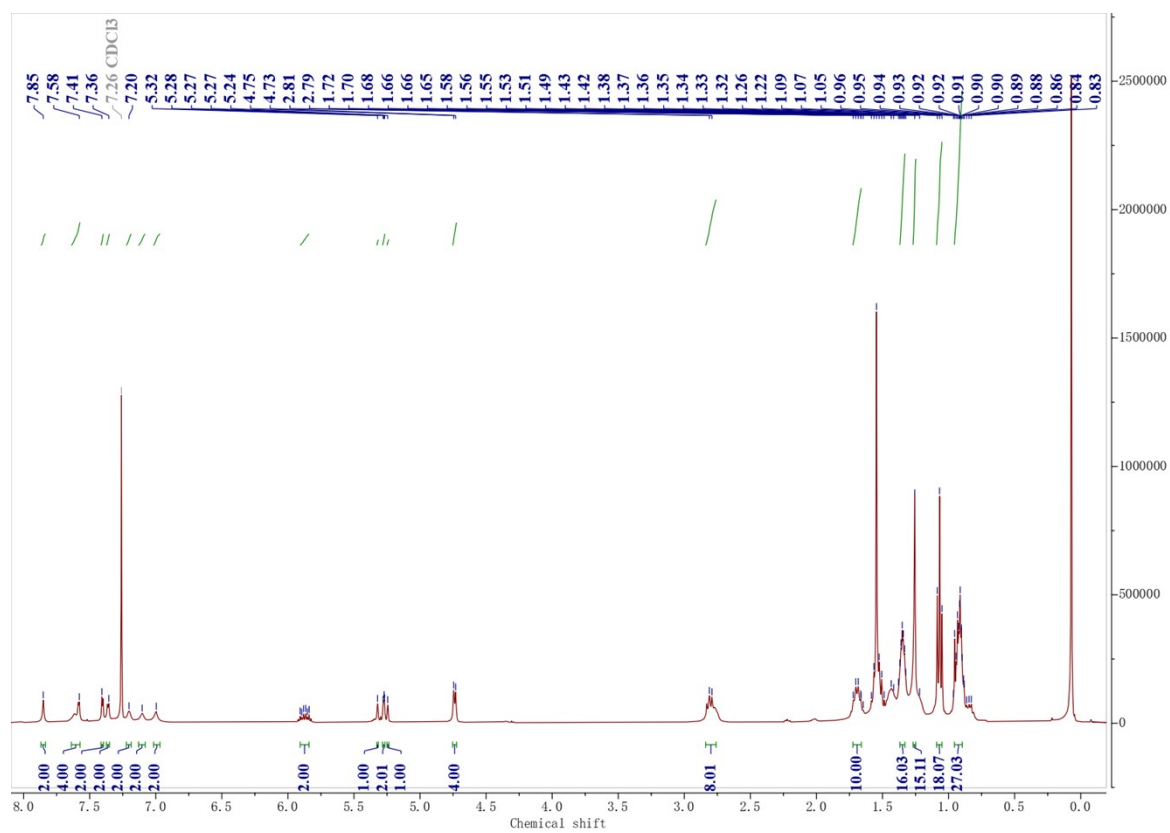

Figure S6.  $^1\text{H}$  NMR spectra of **H35** in  $\text{CDCl}_3$ .

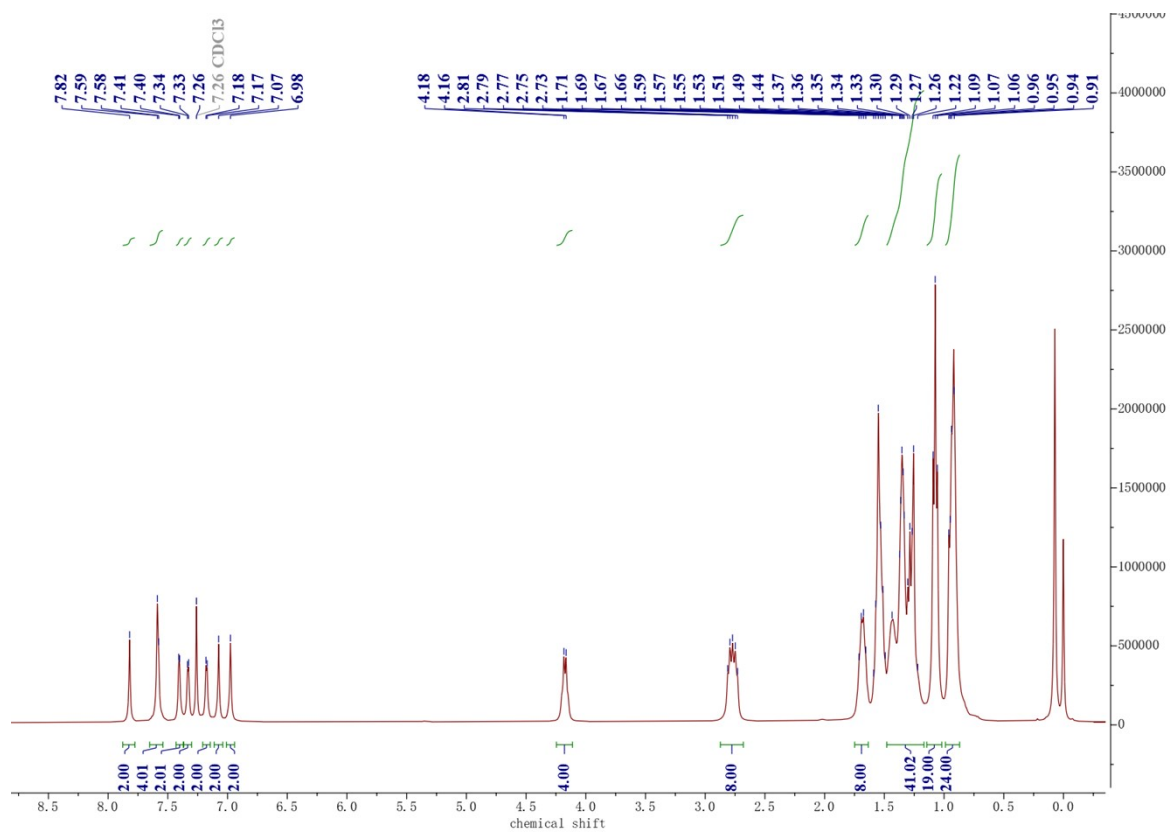

Figure S7.  $^1\text{H}$  NMR spectra of H36 in  $\text{CDCl}_3$ .

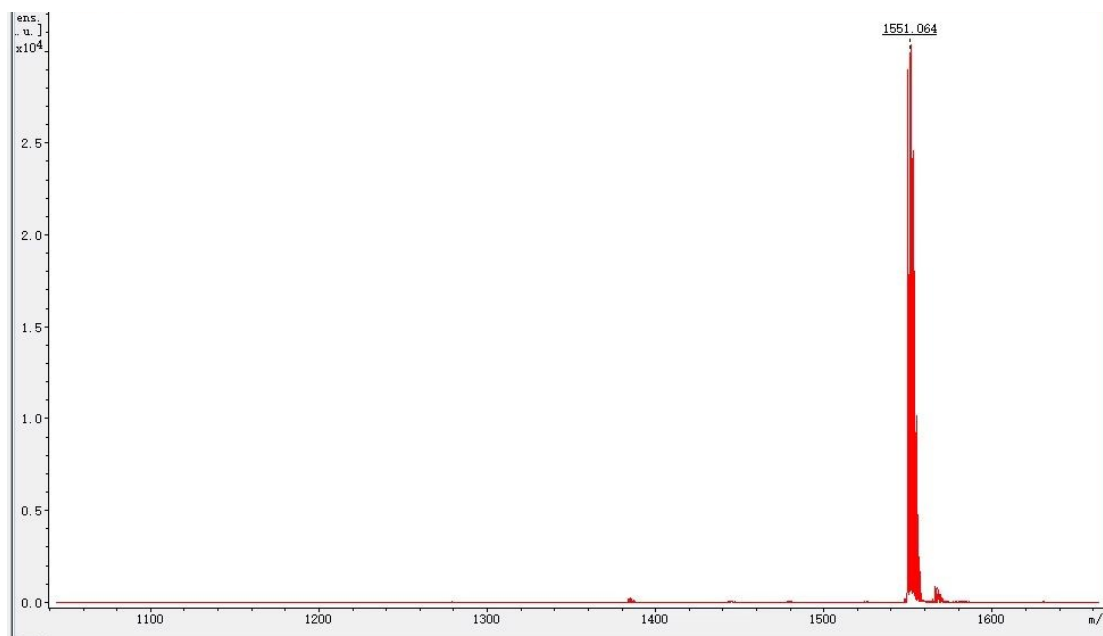

Figure S8. MALDI-TOF-MS spectra of compound 3.

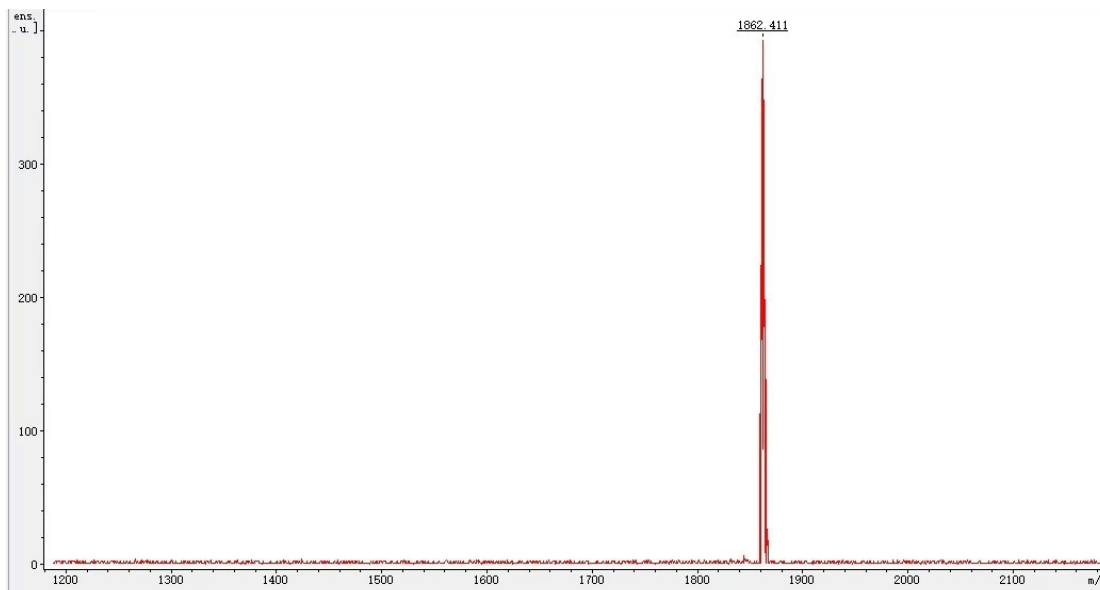

**Figure S9.** MALDI-TOF-MS spectra of H35.

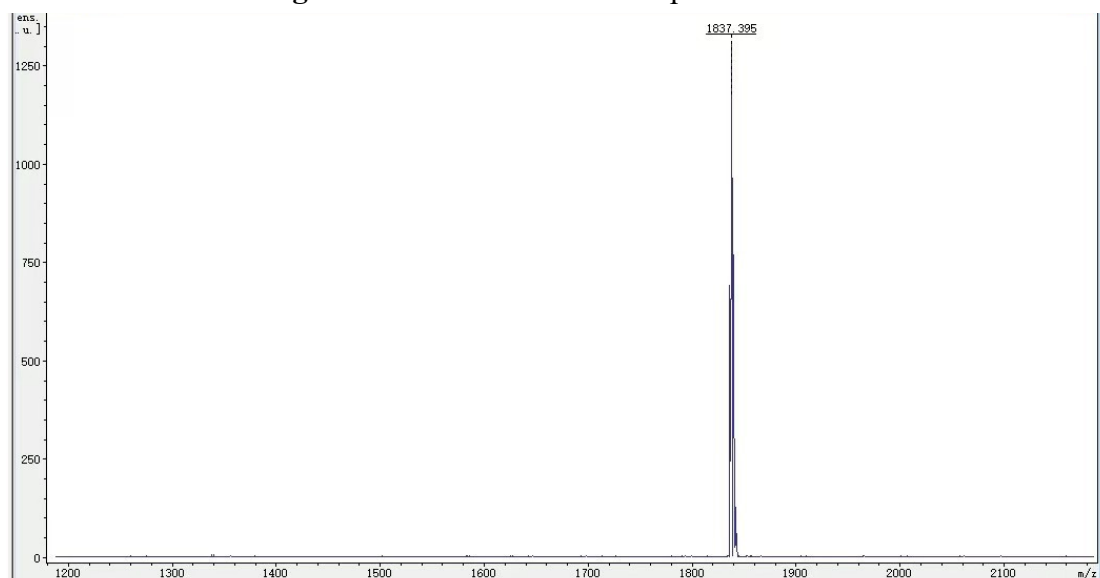

**Figure S10.** MALDI-TOF-MS spectra of H36.

**Table S1.** Optimization of H35:Y6-based ASM-OSCs. The parameters are obtained under the AM1.5G, 100 mW cm<sup>-2</sup>.

| Concentration | D:A   | TA          | $V_{oc}$ (V) | $J_{sc}$ (mA cm <sup>-2</sup> ) | FF (%) | PCE (%) |
|---------------|-------|-------------|--------------|---------------------------------|--------|---------|
| 20mg/ml       | 1.5:1 | 100°C 10min | 0.866        | 21.66                           | 46.30  | 8.68    |
| 20mg/ml       | 1.8:1 | 100°C 10min | 0.858        | 21.90                           | 50.25  | 9.44    |
| 20mg/ml       | 2.0:1 | 100°C 10min | 0.855        | 22.17/21.88                     | 51.29  | 9.72    |
| 20mg/ml       | 2.2:1 | 100°C 10min | 0.854        | 20.20                           | 45.94  | 7.93    |
| 20mg/ml       | 2.5:1 | 100°C 10min | 0.849        | 18.95                           | 45.15  | 7.26    |

|         |       |       |       |       |             |       |       |
|---------|-------|-------|-------|-------|-------------|-------|-------|
| 20mg/ml | 2.0:1 | 80°C  | 5min  | 0.861 | 13.39       | 33.09 | 3.81  |
| 20mg/ml | 2.0:1 | 100°C | 5min  | 0.865 | 19.61       | 45.03 | 7.64  |
| 20mg/ml | 2.0:1 | 120°C | 5min  | 0.837 | 23.67       | 60.76 | 12.03 |
| 20mg/ml | 2.0:1 | 140°C | 5min  | 0.784 | 25.16/23.95 | 69.46 | 13.70 |
| 20mg/ml | 2.0:1 | 160°C | 5min  | 0.749 | 25.51       | 69.70 | 13.33 |
| 20mg/ml | 2.0:1 | 140°C | 2min  | 0.787 | 25.03       | 67.93 | 13.38 |
| 20mg/ml | 2.0:1 | 140°C | 5min  | 0.788 | 25.22       | 69.38 | 13.80 |
| 20mg/ml | 2.0:1 | 140°C | 8min  | 0.788 | 25.98/24.45 | 68.06 | 13.93 |
| 20mg/ml | 2.0:1 | 140°C | 10min | 0.774 | 25.36       | 67.19 | 13.19 |
| 20mg/ml | 2.0:1 | 140°C | 8min  | 0.821 | 26.34/25.10 | 70.39 | 15.21 |

**Table S2.** Optimization of H36:Y6-based ASM-OSCs. The parameters are obtained under the AM1.5G, 100 mW cm<sup>-2</sup>.

| Concentration | D:A   | TA         | $V_{OC}$ (V) | $J_{SC}$ (mAcm <sup>-2</sup> ) | FF(%) | PCE (%) |
|---------------|-------|------------|--------------|--------------------------------|-------|---------|
| 20mg/ml       | 1.5:1 | 100°C 5min | 0.829        | 19.68                          | 40.10 | 6.54    |
| 20mg/ml       | 2.0:1 | 100°C 5min | 0.846        | 20.07/19.45                    | 49.22 | 8.35    |
| 20mg/ml       | 2.5:1 | 100°C 5min | 0.831        | 19.87                          | 48.50 | 8.01    |
| 20mg/ml       | 3.0:1 | 100°C 5min | 0.668        | 18.76                          | 32.52 | 4.07    |
| 20mg/ml       | 2.0:1 | 80°C 5min  | 0.769        | 10.87                          | 33.86 | 2.83    |
| 20mg/ml       | 2.0:1 | 100°C 5min | 0.844        | 19.62/19.48                    | 50.56 | 8.37    |
| 20mg/ml       | 2.0:1 | 120°C 5min | 0.754        | 22.46                          | 37.14 | 6.29    |
| 20mg/ml       | 2.0:1 | 140°C 5min | 0.330        | 21.71                          | 29.63 | 2.12    |

**Table S3.** Optimization of H35:PY-IT-based SM:PA-OSCs. The parameters are obtained under the AM1.5G, 100 mW cm<sup>-2</sup>. The optimized conditions were directly used to prepare H36:PY-IT devices.

| Concentration | D:A   | TA          | $V_{OC}$ (V) | $J_{SC}$ (mA cm <sup>-2</sup> ) | FF(%) | PCE (%) |
|---------------|-------|-------------|--------------|---------------------------------|-------|---------|
| 16mg/ml       | 0.8:1 | 140°C 10min | 0.889        | 17.46                           | 36.52 | 5.67    |
| 16mg/ml       | 1.0:1 | 140°C 10min | 0.905        | 19.96                           | 42.13 | 7.61    |
| 16mg/ml       | 1.2:1 | 140°C 10min | 0.912        | 19.95                           | 43.02 | 7.82    |
| 16mg/ml       | 1.4:1 | 140°C 10min | 0.918        | 20.68                           | 43.18 | 8.20    |
| 16mg/ml       | 1.6:1 | 140°C 10min | 0.911        | 21.14                           | 44.85 | 8.64    |
| 16mg/ml       | 1.8:1 | 140°C 10min | 0.912        | 20.84                           | 46.12 | 8.77    |
| 16mg/ml       | 2.0:1 | 140°C 10min | 0.914        | 21.10                           | 45.75 | 8.82    |
| 16mg/ml       | 2.2:1 | 140°C 10min | 0.924        | 20.00                           | 50.45 | 9.32    |
| 16mg/ml       | 2.5:1 | 140°C 10min | 0.921        | 20.07                           | 51.39 | 9.51    |
| 16mg/ml       | 2.7:1 | 140°C 10min | 0.919        | 20.38/19.46                     | 53.15 | 9.96    |
| 16mg/ml       | 3.0:1 | 140°C 10min | 0.909        | 19.30                           | 50.92 | 8.94    |

|         |       |            |       |             |       |       |
|---------|-------|------------|-------|-------------|-------|-------|
| 16mg/ml | 2.7:1 | 120°C 5min | 0.945 | 18.41       | 50.02 | 8.71  |
| 16mg/ml | 2.7:1 | 140°C 5min | 0.930 | 20.56/19.77 | 56.33 | 10.78 |
| 16mg/ml | 2.7:1 | 160°C 5min | 0.914 | 20.71       | 56.69 | 10.73 |
| 16mg/ml | 2.7:1 | 180°C 5min | 0.897 | 19.54       | 53.86 | 9.45  |
| 16mg/ml | 2.7:1 | 200°C 5min | 0.846 | 18.16       | 53.50 | 8.23  |

**Table S4.** Hole and electron mobility of four devices under the optimized condition as those used for device fabrication.

| Sample    | $\mu_h$ (cm <sup>2</sup> V <sup>-1</sup> s <sup>-1</sup> ) | $\mu_e$ (cm <sup>2</sup> V <sup>-1</sup> s <sup>-1</sup> ) | $\mu_h/\mu_e$ |
|-----------|------------------------------------------------------------|------------------------------------------------------------|---------------|
| H35:Y6    | $2.95 \times 10^{-4}$                                      | $2.75 \times 10^{-4}$                                      | 1.07          |
| H35:PY-IT | $2.03 \times 10^{-4}$                                      | $1.75 \times 10^{-4}$                                      | 1.16          |
| H36:Y6    | $1.84 \times 10^{-4}$                                      | $1.37 \times 10^{-4}$                                      | 1.34          |
| H36:PY-IT | $1.45 \times 10^{-4}$                                      | $1.06 \times 10^{-4}$                                      | 1.37          |

**Table S5.** The detailed parameters of corresponding 1D GIWAXS profiles with (100) and (010) diffraction peaks for H35, H36, Y6 and PY-IT based neat films.

| 100    |                         | IP                    |       |         | OOP                     |                       |       |         |
|--------|-------------------------|-----------------------|-------|---------|-------------------------|-----------------------|-------|---------|
| Sample | peak (Å <sup>-1</sup> ) | <i>d</i> -spacing (Å) | FWHM  | CCL (Å) | peak (Å <sup>-1</sup> ) | <i>d</i> -spacing (Å) | FWHM  | CCL (Å) |
| H35    | 0.32                    | 19.63                 | 0.068 | 92.35   | 0.34                    | 18.47                 | 0.056 | 112.14  |
| H36    | 0.33                    | 19.03                 | 0.062 | 101.29  | 0.34                    | 18.47                 | 0.059 | 106.44  |
| Y6     | 0.44                    | 14.27                 | 0.099 | 63.43   | -                       | -                     | -     | -       |
| PY-IT  | 0.39                    | 16.10                 | 0.137 | 45.84   | -                       | -                     | -     | -       |

| (010)  |                         | IP                    |       |         | OOP                     |                       |       |         |
|--------|-------------------------|-----------------------|-------|---------|-------------------------|-----------------------|-------|---------|
| Sample | peak (Å <sup>-1</sup> ) | <i>d</i> -spacing (Å) | FWHM  | CCL (Å) | peak (Å <sup>-1</sup> ) | <i>d</i> -spacing (Å) | FWHM  | CCL (Å) |
| H35    | 1.72                    | 3.65                  | 0.201 | 31.24   | 1.70                    | 3.69                  | 0.115 | 54.61   |
| H36    | 1.69                    | 3.72                  | 0.216 | 29.07   | 1.68                    | 3.74                  | 0.142 | 44.23   |
| Y6     | -                       | -                     | -     | -       | 1.70                    | 3.69                  | 0.254 | 24.72   |
| PY-IT  | -                       | -                     | -     | -       | 1.59                    | 3.95                  | 0.293 | 21.43   |

**Table S7.** The detailed parameters of corresponding 1D GIWAXS profiles with (100) and (010) diffraction peaks for H35, H36, Y6 and PY-IT-based blend films.

| (100) |                         | IP                    |      |         | OOP                     |                       |      |         |
|-------|-------------------------|-----------------------|------|---------|-------------------------|-----------------------|------|---------|
|       | peak (Å <sup>-1</sup> ) | <i>d</i> -spacing (Å) | FWHM | CCL (Å) | peak (Å <sup>-1</sup> ) | <i>d</i> -spacing (Å) | FWHM | CCL (Å) |

|           |      |       |       |       |      |       |       |        |
|-----------|------|-------|-------|-------|------|-------|-------|--------|
| H35:Y6    | 0.32 | 19.63 | 0.065 | 96.62 | 0.33 | 19.03 | 0.063 | 99.68  |
| H36:Y6    | 0.33 | 19.03 | 0.064 | 98.13 | 0.34 | 18.47 | 0.066 | 95.15  |
| H35:PY-IT | 0.31 | 20.26 | 0.066 | 95.15 | 0.33 | 19.03 | 0.056 | 112.14 |
| H36:PY-IT | 0.33 | 19.03 | 0.073 | 86.03 | 0.35 | 17.94 | 0.064 | 98.13  |

|           | (010)                      |                          |      |            | IP                         |                          |       |            | OOP                        |                          |      |            |
|-----------|----------------------------|--------------------------|------|------------|----------------------------|--------------------------|-------|------------|----------------------------|--------------------------|------|------------|
|           | peak<br>(Å <sup>-1</sup> ) | <i>d</i> -spacing<br>(Å) | FWHM | CCL<br>(Å) | peak<br>(Å <sup>-1</sup> ) | <i>d</i> -spacing<br>(Å) | FWHM  | CCL<br>(Å) | peak<br>(Å <sup>-1</sup> ) | <i>d</i> -spacing<br>(Å) | FWHM | CCL<br>(Å) |
| H35:Y6    | -                          | -                        | -    | -          | 1.71                       | 3.67                     | 0.172 | 36.51      | -                          | -                        | -    | -          |
| H36:Y6    | -                          | -                        | -    | -          | 1.70                       | 3.69                     | 0.192 | 32.71      | -                          | -                        | -    | -          |
| H35:PY-IT | -                          | -                        | -    | -          | 1.69                       | 3.72                     | 0.201 | 31.24      | -                          | -                        | -    | -          |
| H36:PY-IT | -                          | -                        | -    | -          | 1.65                       | 3.80                     | 0.229 | 27.42      | -                          | -                        | -    | -          |

**Table S8.** Summary of contact angles ( $\theta$ ), surface tensions ( $\gamma$ ) and Flory-Huggins interaction parameters ( $\chi$ ) for H35, H36, Y6 and PY-IT films.

| Sample    | $\theta_{\text{water}} (^{\circ})$ | $\theta_{\text{DIM}} (^{\circ})$ | $\gamma$ (mN m <sup>-1</sup> ) | $\chi_{\text{D-A}}$ |
|-----------|------------------------------------|----------------------------------|--------------------------------|---------------------|
| H35       | 104.5                              | 41.5                             | 41.98                          | -                   |
| H36       | 100.5                              | 37.5                             | 43.15                          | -                   |
| Y6        | 88.5                               | 39.0                             | 40.14                          | -                   |
| PY-IT     | 91.5                               | 40.0                             | 39.82                          | -                   |
| H35:Y6    | -                                  | -                                | -                              | 0.020 $\kappa$      |
| H36:Y6    | -                                  | -                                | -                              | 0.054 $\kappa$      |
| H35:PY-IT | -                                  | -                                | -                              | 0.029 $\kappa$      |
| H36:PY-IT | -                                  | -                                | -                              | 0.067 $\kappa$      |

The Flory-Huggins interaction parameter between the donor and acceptor is calculated through the

equation:  $\chi = k(\sqrt{\gamma_A} - \sqrt{\gamma_D})^2$
